# Supplementary material
Source: publisher figshare collection journal article supplement (https://acs.figshare.com/ndownloader/files/21877152)
Supplement: Supplementary file 1 [file 21877152]

## **Isolated Indium Hydrides in CHA Zeolites: Speciation and Catalysis for Nonoxidative Dehydrogenation of Ethane**

Zen Maeno<sup>\*†</sup>, Shunsaku Yasumura<sup>†</sup>, Xiaopeng Wu<sup>†</sup>, Mengwen Huang<sup>†</sup>, Chong Liu<sup>†</sup>, Takashi Toyao<sup>†,‡</sup>, Ken-ichi Shimizu<sup>\*†,‡</sup>

<sup>†</sup> Institute for Catalysis, Hokkaido University, N-21, W-10, Sapporo 001-0021, Japan

<sup>‡</sup> Elements Strategy Initiative for Catalysts and Batteries, Kyoto University, Katsura, Kyoto 615-8520, Japan

<sup>\*</sup>Corresponding authors

Zen Maeno, E-mail: maeno@cat.hokudai.ac.jp

Ken-ichi Shimizu, E-mail: kshimizu@cat.hokudai.ac.jp

### FTIR measurement

Fourier transform infrared spectroscopy (FTIR) measurements were carried out in a home-made *in situ* cell. A self-supported disc comprising mixture of  $\text{In}_2\text{O}_3$  and proton-type CHA ( $\text{In}_2\text{O}_3/\text{CHA}$ , 40 mg) was dehydrated under He flow at 773 K and then treated with  $\text{H}_2$  or 10%  $\text{H}_2/\text{He}$ . For measurement of In hydrides, the obtained sample was kept at 773 K under vacuum for 2 h and a background spectrum was obtained below 153 K by cooling the cell using liquid  $\text{N}_2$ . Next,  $\text{H}_2$  flow was introduced to the sample that was kept under  $\text{H}_2$  at 773 K for 2 h. Further, the temperature was decreased to below 153 K and the FTIR spectra were recorded (JASCO FT/IR-4600 equipped with a mercury cadmium telluride (MCT) detector). The reaction of In hydrides with ethylene was carried out by treating  $\text{In-CHA}(\text{H}_2)$  with 10%  $\text{C}_2\text{H}_4/\text{He}$  at 473 K while the *in situ* formation of In hydrides through the reaction of In-CHA with ethane was examined at 773 K under 100%  $\text{C}_2\text{H}_6$ .

For  $\text{NH}_3$  adsorption, temperature was decreased to 373 K after the treatment of the disk of  $\text{In}_2\text{O}_3/\text{CHA}$  under 10%  $\text{H}_2/\text{He}$  flow and then the flow was changed from He to purge  $\text{H}_2$ . A background spectrum under He was obtained followed by introducing  $\text{NH}_3$  (1%) to the sample, purging with He, and monitoring the peak derived from adsorbed  $\text{NH}_3$  at 373 K.

### H–D exchange reaction

For the FTIR measurement, the reactions were carried out using the home-made *in situ* cell described above. Mass spectroscopic observations of a H–D exchange reaction were conducted in a fixed-bed continuous flow system as follows. A powder of  $\text{In}_2\text{O}_3/\text{CHA}$  (0.2 g) was treated under 40 mL/min of 5%  $\text{H}_2/\text{N}_2$  at 773 K to prepare *in situ*  $\text{In-CHA}(\text{H}_2)$ . Next, the temperature decreased to 313 K under 40 mL/min of 5%  $\text{H}_2/\text{N}_2$  flow, and subsequently, the gas was switched to  $\text{N}_2$  for at least 1 h to purge  $\text{H}_2$  from the gas phase. After the pre-treatment, the H–D exchange reaction of  $\text{In-CHA}(\text{H}_2)$  with  $\text{D}_2$  was investigated under 40 mL/min of 5%  $\text{D}_2/\text{N}_2$  flow with increase in temperature from 313 K to 473 K. The gas-phase products were analyzed by mass spectroscopy (BELmass, MicrotracBEL). The reverse reaction ( $\text{In-CHA}(\text{D}_2)$  with  $\text{H}_2$ ) was examined in a similar way using the *in situ* prepared  $\text{In-CHA}(\text{D}_2)$  and 40 mL/min of 5%  $\text{H}_2/\text{N}_2$  flow.

### XAFS measurement

A In K-edge X-ray absorption fine structure (XAFS) measurement was conducted in transmission mode in a BL14B2 station attached to a Si(311) monochromator at SPring-8 (JASRI), Japan (Proposal Nos. 2019A1614 and 2019B1686). A flow reaction system containing a flow-type cell was used for *in situ* XAFS measurements. A disc of In-CHA was prepared using a self-supported disc of  $\text{In}_2\text{O}_3/\text{CHA}$  under 5%  $\text{H}_2/\text{He}$  flow at 773 K in a flow type quartz cell with gas mixture system using mass flow controllers. After the preparation, the temperature was decreased to room temperature (ca. 298 K) followed by the XAFS measurement.

## Computational details

Density functional theory calculations were performed using the Vienna ab initio simulation package (VASP) <sup>1,2</sup> with a periodic boundary condition under a Kohn–Sham formulation <sup>3,4</sup>. All atoms were allowed to fully relax during calculations. Projected augmented wave method <sup>5,6</sup> was applied to describe the core-electron interactions and plane wave basis set was limited to cut-off energy of 450 eV. The forces on atoms were minimized to less than 0.03 eV/Å. An electron-exchange correlation was considered using the generalized gradient approximated Perdew–Burke–Ernzerhof (GGA–PBE) functional <sup>7</sup>. The  $\Gamma$  point was used for Brillouin zone sampling. Van der Waals (vdW) dispersion corrections were included in all calculations by the semi-empirical Grimme’s D3 method <sup>8,9</sup>. the lattice constants of CHA zeolite were fixed at values given in the International Zeolite Association database ( $a = b = 13.675$  Å,  $c = 14.767$  Å,  $\alpha = \beta = 90.0^\circ$ , and  $\gamma = 120^\circ$ ) <sup>10</sup>. For vibration calculation, all atoms except In hydrides were fixed. The conjugate gradient method was used to optimize intermediate structures during the climbing-image nudge elastic band (CI–NEB) calculations as implemented in VTST-Tools <sup>11</sup>. For CI–NEB calculations, the spring constant between adjacent images was set to 5.0 eV/Å<sup>2</sup>; moreover, the calculations were considered converged when the maximum forces on all atoms were less than 0.05 eV Å<sup>-1</sup>. The Gibbs free energy of each species was calculated using vibrational frequency analysis based on harmonic normal mode approximation by the finite difference method in VASP. A limited set of atoms that are determined as non-zeolite framework atoms (indium, carbon, and hydrogen atoms) in the unit cell, were used to calculate vibrational frequencies. The vibrational contribution to the free energy for each structure at 873.15 K was calculated based on the calculated frequencies. Neglecting the spurious frequencies contributes to the enthalpy and entropy; hence, spurious frequencies under 100 cm<sup>-1</sup> were replaced with 50 cm<sup>-1</sup> for all the structures to give consistent results <sup>12</sup>. Ethane, ethylene, and hydrogen in gas phase were calculated using ideal gas approximation at 873.15 K and their transitional and rotational contributions to the free energy were evaluated at partial pressures of 0.02,  $2 \times 10^{-4}$ , and  $2 \times 10^{-4}$  atm, respectively.

## Dehydrogenation of ethane

Nonoxidative dehydrogenation of ethane was performed in a fixed-bed continuous-flow system at 933 K. The catalyst was prepared *in situ* by treatment of a 0.1 g of In<sub>2</sub>O<sub>3</sub>/CHA under 50 mL of 10% H<sub>2</sub>/He flow at 773 K for 30 min to promote RRSIE followed by He purge for 1 h before dehydrogenation. Ga- and Zn-exchanged zeolites were prepared through the impregnation of the corresponding nitrate precursors (Ga(NO<sub>3</sub>)<sub>3</sub>•9H<sub>2</sub>O and Zn(NO<sub>3</sub>)<sub>2</sub>•6H<sub>2</sub>O) to CHA (Tosoh, NH<sub>4</sub><sup>+</sup>-type, SiO<sub>2</sub>/Al<sub>2</sub>O<sub>3</sub> = 22.3) or ZSM5 (Tosoh, NH<sub>4</sub><sup>+</sup>-type, SiO<sub>2</sub>/Al<sub>2</sub>O<sub>3</sub> = 22) followed by calcination under air at 773 K. Before the reaction, the catalysts were treated under a H<sub>2</sub>/He flow at 993 K for Ga or at 773 K for Zn in the reactor. PtSn/Al<sub>2</sub>O<sub>3</sub> and PtGa/Al<sub>2</sub>O<sub>3</sub> were prepared by a conventional impregnation method of H<sub>2</sub>PtCl<sub>6</sub>

and  $(\text{NH}_4)_2\text{SnCl}_6$  or  $\text{Ga}(\text{NO}_3)_3$  to  $\gamma\text{-Al}_2\text{O}_3$  (prepared by calcination of boehmite ( $\gamma\text{-AlOOH}$ , SASOL Chemicals) at 1173 K for 3 h) followed by *in situ* reduction of the obtained powder under a  $\text{H}_2/\text{He}$  flow at 973 K for 1 h. For all the dehydrogenation experiments, the gas from the reactor was analyzed by Shimadzu GC-14B with a SHINCARBON ST column and gas sampler (GS5100). The conversion, selectivity, and carbon balance were calculated as follows:

$$\begin{aligned}\text{Conv. [\%]} &= \frac{[\text{ethane}]_{\text{init}} - [\text{ethane}]}{[\text{ethane}]_{\text{init}}} \times 100 \\ \text{Selec. [\%]} &= \frac{[\text{ethylene}]}{[\text{ethylene}] + [\text{methane}]} \times 100 \\ \text{Carbon balance [\%]} &= \frac{([\text{ethane}] + [\text{ethylene}] + [\text{methane}])}{[\text{ethane}]_{\text{init}}} \times 100\end{aligned}$$

For reuse experiment, the In-CHA after 90 h reaction was treated with 50 mL of 5%  $\text{O}_2/\text{He}$  at 873 K for 90 min in the reactor to calcine the coke and then treated with 50 mL of 10%  $\text{H}_2/\text{He}$  followed by He purge for 1 h. The dehydrogenation was performed in the same reaction conditions for 20 h. To obtain the relationship between conversion and selectivity, the reaction was carried out at 773–893 K for Ga-ZSM-5 and PtSn/ $\text{Al}_2\text{O}_3$  and at 913–953 K, respectively.

The kinetic studies were carried out under the following conditions.

- TOF dependency on  $p(\text{H}_2)$  for In-CHA (In/Al = 0.8)

$p(\text{H}_2) = 0.02\text{--}0.08$ ,  $p(\text{C}_2\text{H}_6) = 0.02$ , balanced with He (total flow rate: 50 mL/min), 933 K

- TOF dependency on  $p(\text{C}_2\text{H}_6)$  for In-CHA (In/Al = 0.8)

$p(\text{H}_2) = 0.02$ ,  $p(\text{C}_2\text{H}_6) = 0.02\text{--}0.08$ , balanced with He (total flow rate: 50 mL/min), 933 K

- TOF dependency on  $p(\text{H}_2)$  for Ga-CHA (Ga/Al = 0.8)

$p(\text{H}_2) = 0.02\text{--}0.08$ ,  $p(\text{C}_2\text{H}_6) = 0.04$ , balanced with He (total flow rate: 50 mL/min), 913 K

- TOF dependency on  $p(\text{C}_2\text{H}_6)$  for Ga-CHA (Ga/Al = 0.8)

$p(\text{H}_2) = 0.04$ ,  $p(\text{C}_2\text{H}_6) = 0.02\text{--}0.08$ , balanced with He (total flow rate: 50 mL/min), 913 K

- M/Al effect on formation rate for In-CHA

$p(\text{C}_2\text{H}_6) = 0.02$ , balanced with He (total flow rate: 50 mL/min), 933 K

- M/Al effect on formation rate for Ga-CHA

$p(\text{C}_2\text{H}_6) = 0.04$ , balanced with He (total flow rate: 50 mL/min), 913 K

- Eyring plot for In-CHA (In/Al = 0.8)

$p(\text{C}_2\text{H}_6) = 0.02$ , balanced with He (total flow rate: 50 mL/min), 873–933 K

- Eyring plot for Ga-CHA (Ga/Al = 0.8)

$p(\text{C}_2\text{H}_6) = 0.04$ , balanced with He (total flow rate: 50 mL/min), 873–933 K

**Temperature-programmed oxidation (TPO) measurement**

TPO measurement was performed using BELCAT II (MicrotracBEL). After the 2 h reaction, 40 mg of catalyst was used for the TPO experiment. The catalyst was pretreated at 423 K for 30 min under He atmosphere. The gas flow was switched to 50% O<sub>2</sub>/He (40 mLmin<sup>-1</sup>) and then the temperature was increased to 1073 K at 5 K/min. During the reaction, the CO<sub>2</sub> generated through coke oxidation ( $m/e = 44$ ) was measured by mass spectroscopy (BELmass, MicrotracBEL).

## Figures

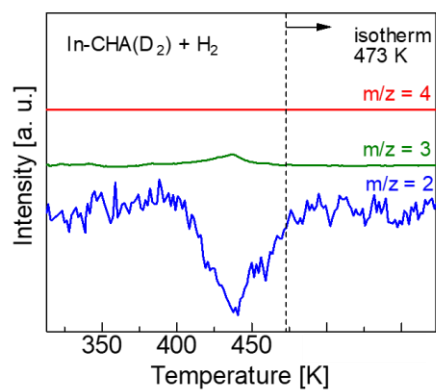

**Figure S1.** Mass profiles for  $m/z = 2, 3,$  and  $4$  during the reaction between In-CHA(D<sub>2</sub>) and H<sub>2</sub>

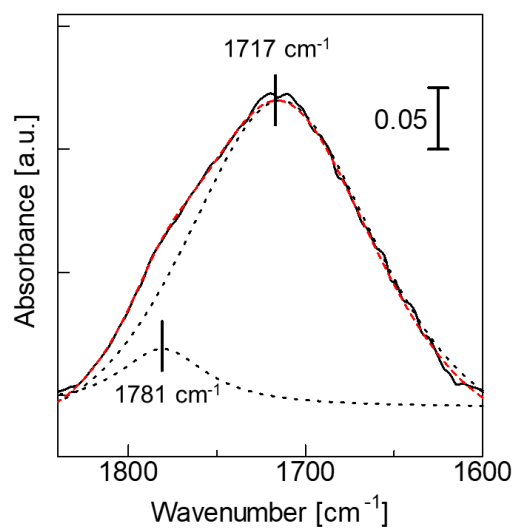

**Figure S2.** Deconvolution of the bands around 1700–1800 cm<sup>-1</sup> in the FTIR spectrum of In-CHA(H<sub>2</sub>)

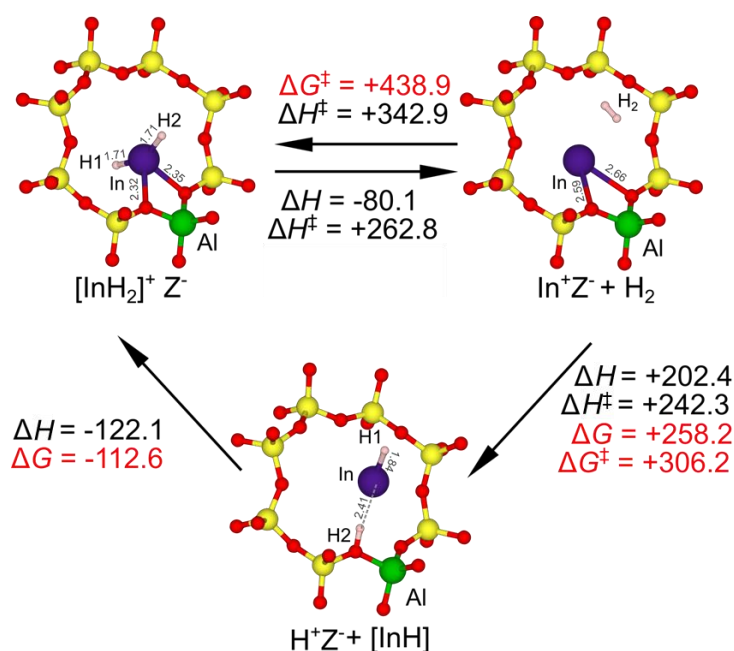

**Figure S3.** Enthalpy and free energy for interconversion between Z[InH<sub>2</sub>] and Z[In]

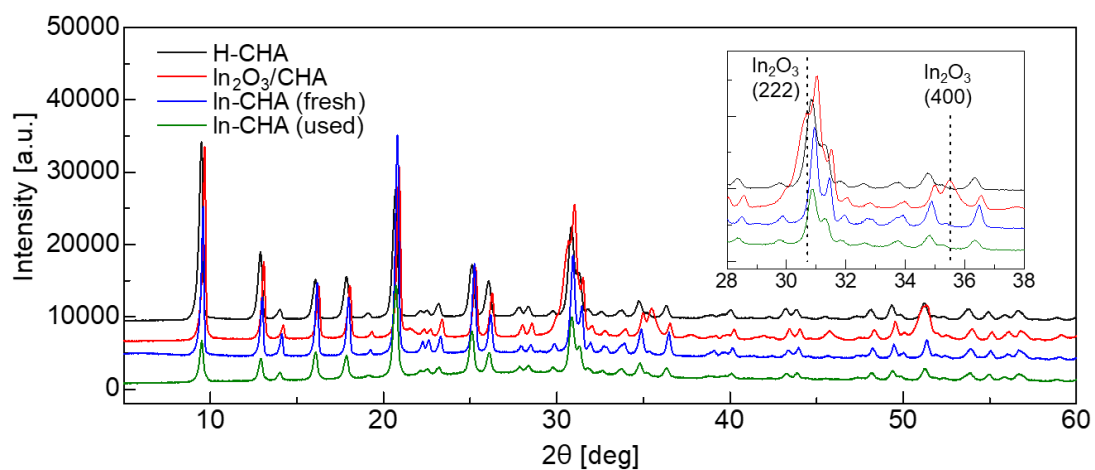

**Figure S4.** XRD pattern of the fresh In-CHA, precursor material In<sub>2</sub>O<sub>3</sub>/CHA, In-CHA used for the dehydrogenation, and H-CHA

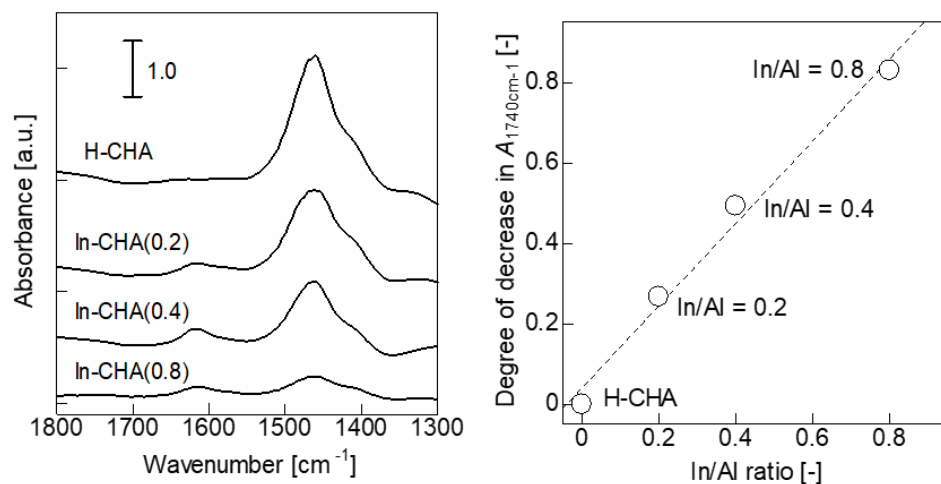

**Figure S5.** FTIR spectra of  $\text{NH}_3$  adsorption experiment for In-CHA with different In/Al ratio (left) and relationship between the degree of decrease in peak area around  $1740 \text{ cm}^{-1}$  ( $A_{1740\text{cm}^{-1}}$ ) and In/Al ratio (right)

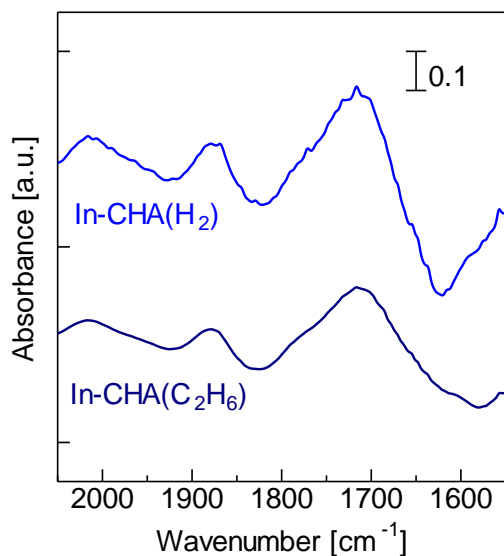

**Figure S6.** FTIR spectra of the In-CHA after treatment with ethane at 773 K

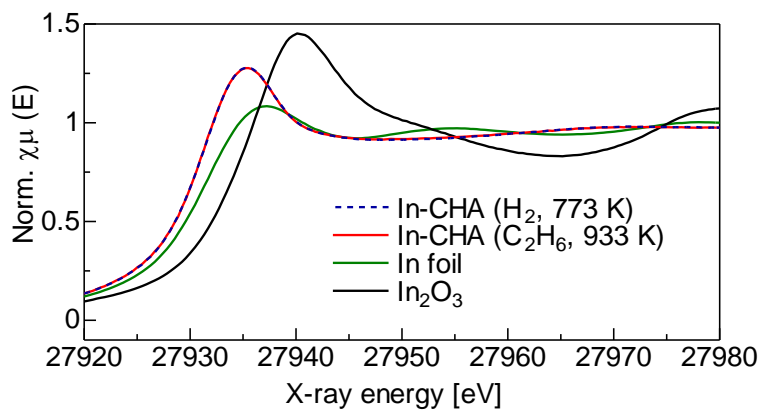

**Figure S7.** *In situ* XAFS spectra of In-CHA in the presence of  $\text{H}_2$  (773 K) or ethane (933 K)



## References

- (1) Kresse, G.; Furthmüller, J. Efficient Iterative Schemes for *Ab Initio* Total-Energy Calculations Using a Plane-Wave Basis Set. *Phys. Rev. B* **1996**, *54*, 11169–11186.
- (2) Kresse, G.; Furthmüller, J. Efficiency of Ab-Initio Total Energy Calculations for Metals and Semiconductors Using a Plane-Wave Basis Set. *Comput. Mater. Sci.* **1996**, *6*, 15–50.
- (3) Honnenberg, P.; Kohn, W. Inhomogeneous Electron Gas. *Phys. Rev. B* **1964**, *136*, B864–B871.
- (4) Kohn, W.; Sham, L. J. Self-Consistent Equations Including Exchange and Correlation Effect. *Phys. Rev. A* **1965**, *140*, A1133–A1138.
- (5) Blöchl, P. E. Projector Augmented-Wave Method. *Phys. Rev. B* **1994**, *50*, 17953–17979.
- (6) Kresse, G.; Joubert, D. Kresse, Joubert From Ultrasoft Pseudopotentials to the Projector Augmented-Wave Method. *Phys. Rev. B* **1999**, *59*, 1758–1775.
- (7) Perdew, J. P.; Burke, K.; Ernzerhof, M. Generalized Gradient Approximation Made Simple. *Phys. Rev. Lett.* **1996**, *77*, 3865–3868.
- (8) Grimme, S.; Antony, J.; Ehrlich, S.; Krieg, H. A Consistent and Accurate Ab Initio Parametrization of Density Functional Dispersion Correction (DFT-D) for the 94 Elements H–Pu. *J. Chem. Phys.* **2010**, *132*, 154104.
- (9) Grimme, S.; Ehrlich, S.; Goerigk, L. Effect of the Damping Function in Dispersion Corrected Density Functional Theory. *J. Comput. Chem.* **2011**, *32*, 1456–1465.
- (10) Baerlocher, C.; McCusker, L. B. Database of Zeolite Structures.
- (11) Henkelman, G.; Uberuaga, B. P.; Jónsson, H. Climbing Image Nudged Elastic Band Method for Finding Saddle Points and Minimum Energy Paths. *J. Chem. Phys.* **2000**, *113*, 9901–9904.
- (12) De Moor, B. A.; Reyniers, M.-F.; Marin, G. B. Physisorption and Chemisorption of Alkanes and Alkenes in H-FAU: A Combined Ab Initio–Statistical Thermodynamics Study. *Phys. Chem. Chem. Phys.* **2009**, *11*, 2939–2958.
